# Supplementary material for: Superprotonic conduction of intrinsically zwitterionic microporous polymers based on easy-to-make squaraine, croconaine and rhodizaine dyes
Source: Royal Society of Chemistry journal article supplement (doi:10.1039/d2na00177b), 2022-01-01
Supplement: d2na00177b1.pdf [file d2na00177b1.pdf]

# **Superprotonic Conduction of Intrinsically Zwitterionic Microporous Polymers Based on Easy-to-Make Squaraine, Croconaine and Rhodizaine Dyes**

## **Electronic Supplementary Information**

Dominic Taylor,<sup>2,⊥</sup> Xuanhe Hu,<sup>1,⊥</sup> Can-Min Wu,<sup>1</sup> John M. Tobin,<sup>2,⊥</sup> Zuzana Oriou,<sup>3</sup> Jun He,<sup>1,\*</sup>  
Zhengtao Xu,<sup>4,\*</sup> and Filipe Vilela.<sup>2,\*</sup>

<sup>1</sup>School of Chemical Engineering and Light Industry, Guangdong University of Technology, Guangzhou, Guangdong 510006, China.

<sup>2</sup>School of Engineering and Physical Sciences, Heriot-Watt University, Edinburgh, EH14 4AS, United Kingdom.

<sup>3</sup>Materials Innovation Factory and Department of Chemistry, University of Liverpool, Crown Street, Liverpool, L69 7ZD, United Kingdom.

<sup>4</sup>Institute of Materials Research and Engineering, 2 Fusionopolis Way, Innovis Building, Singapore 138634.

E-mail: [junhe@gdut.edu.cn](mailto:junhe@gdut.edu.cn), [zhengtao@imre.a-star.edu.sg](mailto:zhengtao@imre.a-star.edu.sg), [f.vilela@hw.ac.uk](mailto:f.vilela@hw.ac.uk)

⊥ These authors contributed equally to this work.

## 1. Experimental Methods

### Synthesis of 1,3,5-tris(2,3,3-trimethyl-3H-indol-5-yl)benzene (1)

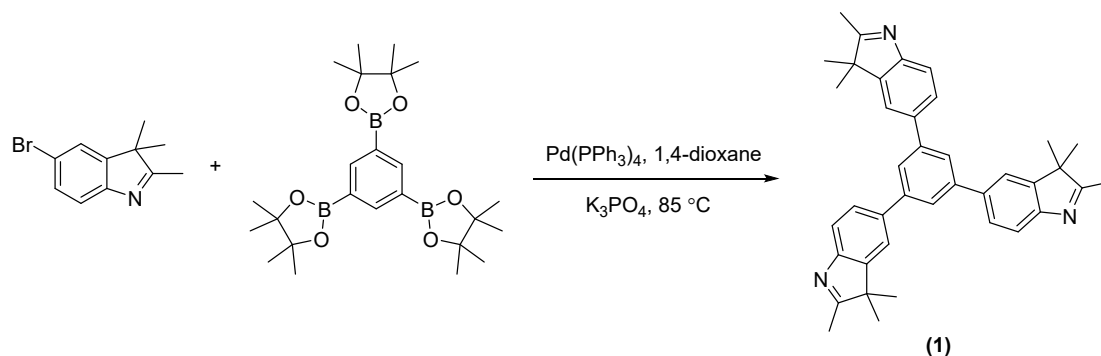

A two-neck round-bottomed flask (100 mL) was loaded with a magnetic stirring bar and 1,3,5-tris(4,4,5,5-tetramethyl-1,3,2-dioxaborolan-2-yl)benzene (2.0 g, 4.38 mmol), K<sub>3</sub>PO<sub>4</sub> (8.4 g, 39.57 mmol) and Pd(PPh<sub>3</sub>)<sub>4</sub> (250.0 mg, 0.22 mmol), followed by repetition of evacuation and refilling with N<sub>2</sub> thrice. Dry 1,4-dioxane (50 mL) was degassed for 15 minutes and injected into the flask *via* cannula under an N<sub>2</sub> stream. 5-Bromo-2,3,3-trimethyl indole (3.7 g, 15.54 mmol) was added under a N<sub>2</sub> atmosphere. The flask was then connected to a condenser and the mixture was heated to 85 °C and stirred overnight. The obtained mixture was poured into water (50 mL) and extracted with ethyl acetate (3 × 150 mL). The combined organic layer was then washed with water (3 × 100 mL) and dried with anhydrous Na<sub>2</sub>SO<sub>4</sub>. Crude product was obtained after the removal of organic solvent using a rotary evaporator. Further purification by column chromatography (silica gel, with EtOAc as the eluent) afforded a pale-yellow solid (1.7 g, 71%). <sup>1</sup>H NMR (300 MHz, CDCl<sub>3</sub>): δ<sub>ppm</sub> = 1.37 (s, 18 H), 2.32 (s, 9 H), 7.59 (s, 3 H), 7.65 (s+d, 6 H), 7.76 (s, 3 H).

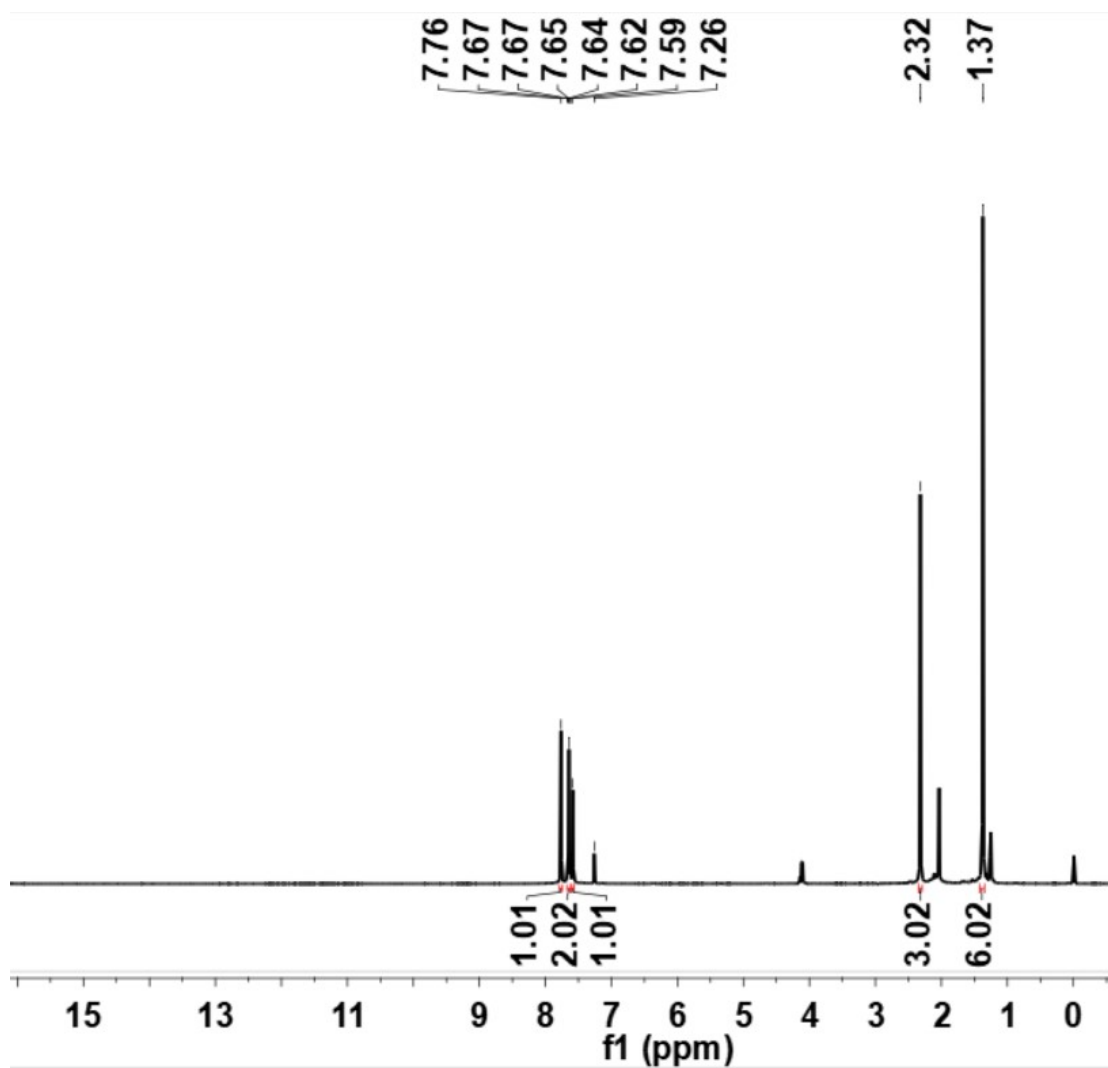

**Fig. S1**  $^1\text{H}$  NMR of compound **1** (300 MHz, 30 °C,  $\text{CDCl}_3$ )  $\delta_{\text{ppm}}$  = 1.37 (s, 6 H), 2.32 (s, 3 H), 7.59 (s, 1 H), 7.65 (s+d, 2 H), 7.76 (s, 1 H).

## Synthesis of polysquaraine CPP (PSQ)

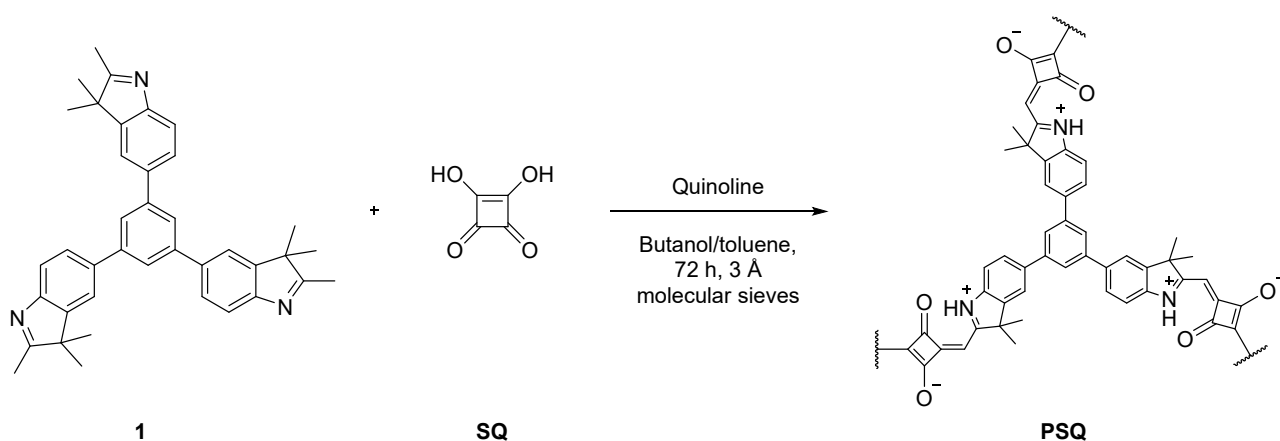

1,3,5-Tris(2,3,3-trimethyl-3H-indol-5-yl)benzene (300 mg, 0.545 mmol), squaric acid (94 mg, 0.82 mmol), and quinoline (20 mg, 0.11 mmol) were added to a flask, dissolved in a butanol/toluene mixture (20 mL, v/v 1:1), and deoxygenated *via* bubbling with N<sub>2</sub> for 10 min. The flask was fitted with a Dean-Stark condenser containing molecular sieves (3 Å) and then attached to a condenser. The reaction was heated to 130 °C and left to react over 3 days. After this time, a dark, insoluble solid had formed. The precipitate was filtered and washed with H<sub>2</sub>O, acetone and THF. The resulting polymer was purified *via* Soxhlet extraction with toluene (24 h) and chloroform (24 h) and dried *in vacuo* to afford 350 mg (96%) of a metallic red powder.

### Synthesis of polycroconaine CPP (PCR)

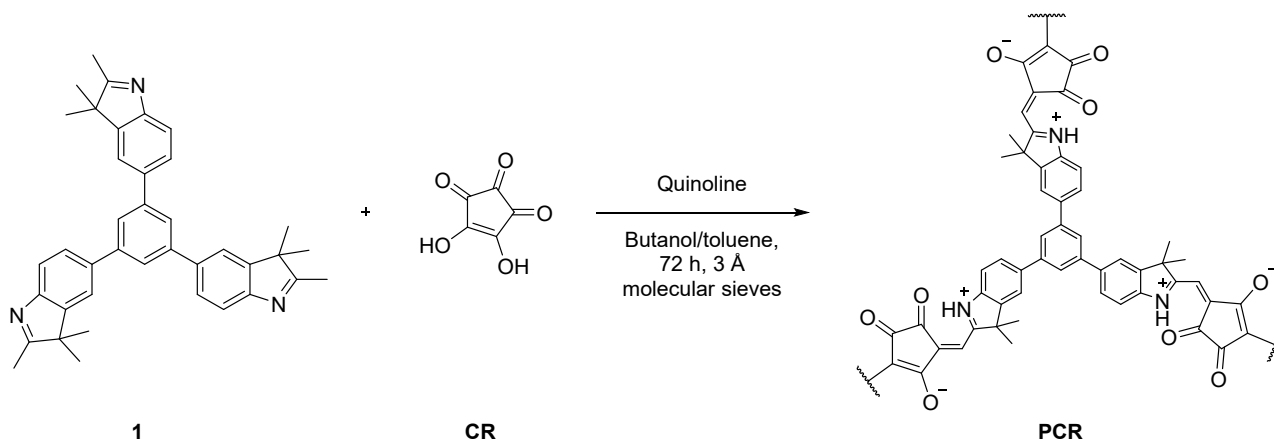

1,3,5-Tris(2,3,3-trimethyl-3H-indol-5-yl)benzene (300 mg, 0.545 mmol), croconic acid (116 mg, 0.82 mmol), and quinoline (20 mg, 0.11 mmol) were added to a flask, dissolved in a butanol/toluene mixture (20 ml; v/v 1:1), and deoxygenated *via* bubbling with N<sub>2</sub> for 10 min. The reaction flask was equipped with Dean-Stark condenser containing molecular sieves (3A) and then attached to a condenser. The reaction was heated to 130 °C and left to react over 3 days. After this time, a dark, insoluble solid had formed. The precipitate was filtered and washed with H<sub>2</sub>O, acetone and THF. The resulting polymer was purified *via* Soxhlet extraction with toluene (24 h) and chloroform (24 h) and dried *in vacuo* to afford 330 mg (85%) of a metallic green powder.

### Synthesis of polyrhodizaine CPP (PRH)

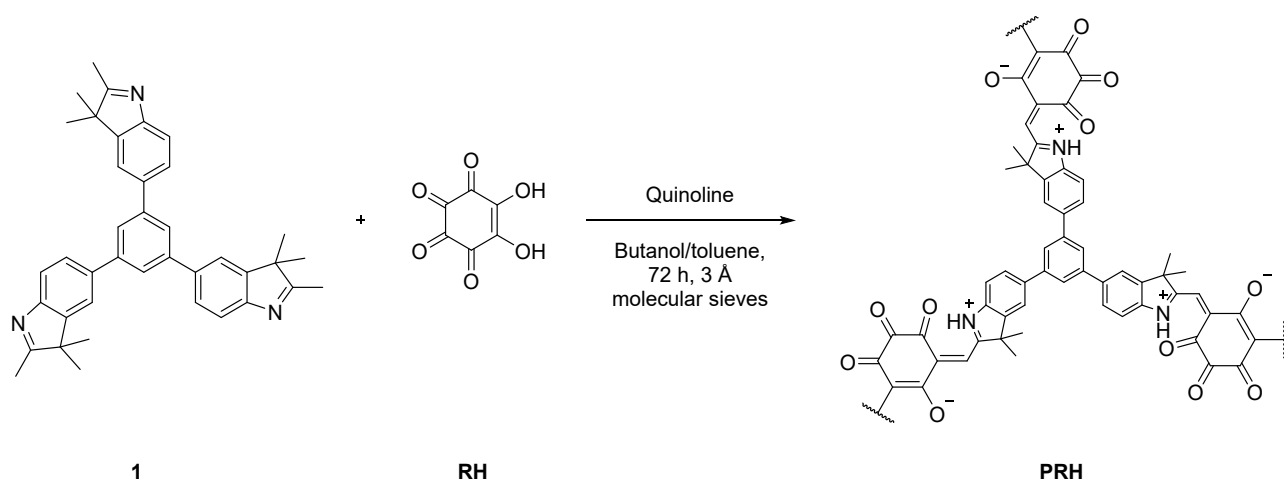

1,3,5-Tris(2,3,3-trimethyl-3H-indol-5-yl)benzene (300 mg, 0.545 mmol), rhodizonic acid (169 mg, 0.2 mmol), and quinolone (16 mg, 0.11 mmol) were added to a flask, dissolved in a butanol/toluene mixture (20 mL; v/v 1:1), and deoxygenated *via* bubbling with N<sub>2</sub> for 10 min. The flask was fitted with a Dean-Stark condenser with molecular sieves (3A) and then attached to a condenser. The reaction was heated to 130 °C and left to react over 3 days. After this time, a dark, insoluble solid had formed. The precipitate was filtered and washed with H<sub>2</sub>O, acetone and THF. The resulting polymer was purified *via* Soxhlet extraction with methanol (24 h) and THF (24 h) and dried *in vacuo* to afford 442 mg (97%) of a dark blue powder.

## 2. Characterization of Synthesized Materials

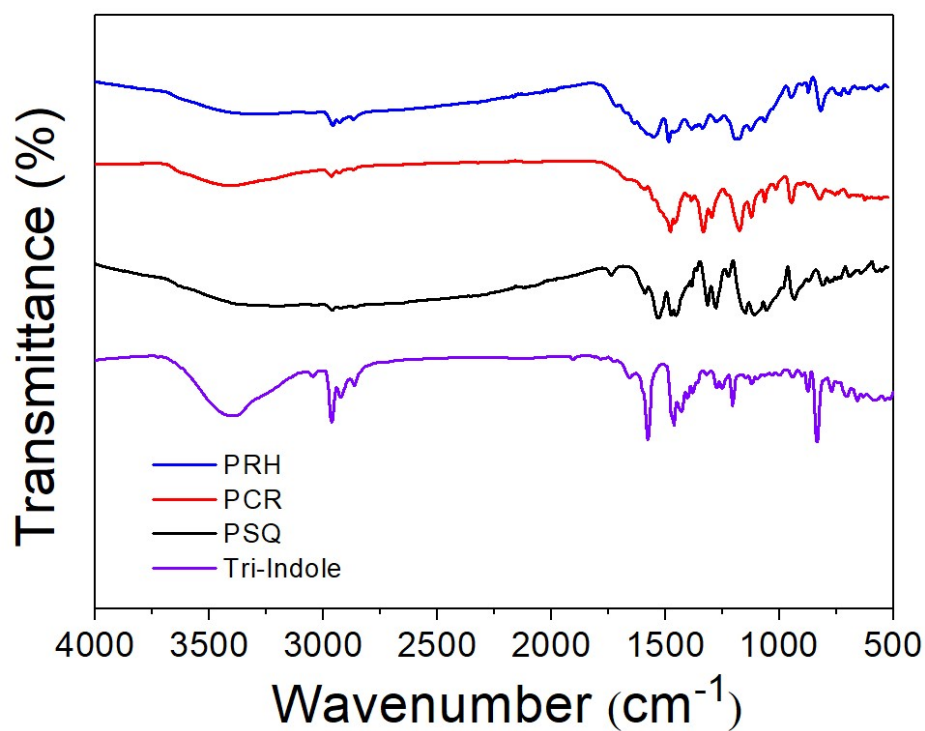

Fig. S2 FT-IR of the tri-substituted indole (1) and the three polymers: **PSQ**, **PCR**, and **PRH**.

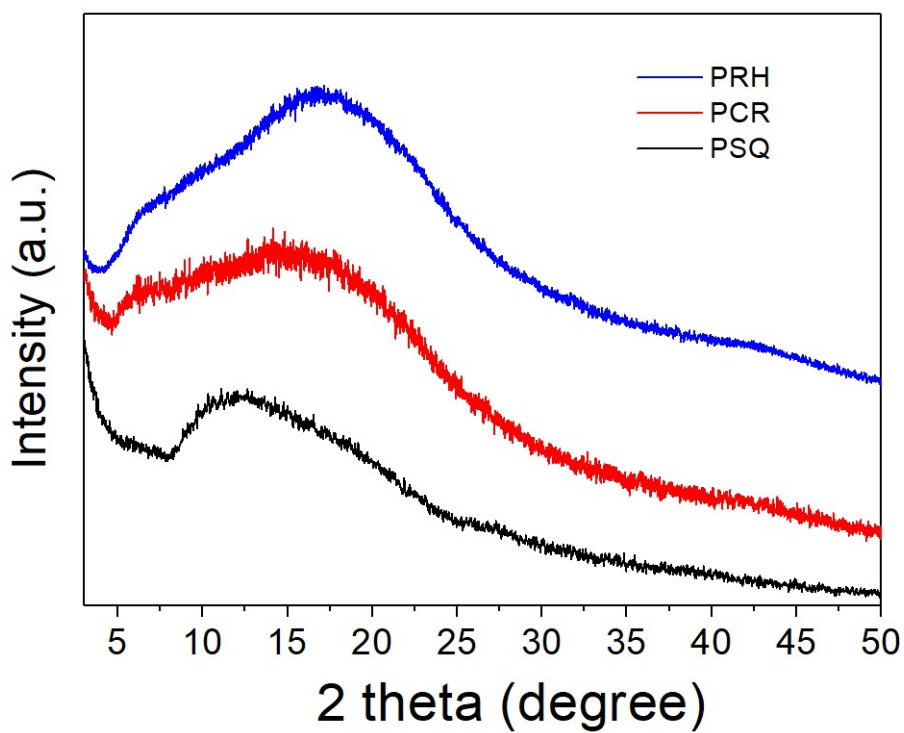

Fig. S3 PXRD patterns of **PSQ**, **PCR** and **PRH**.

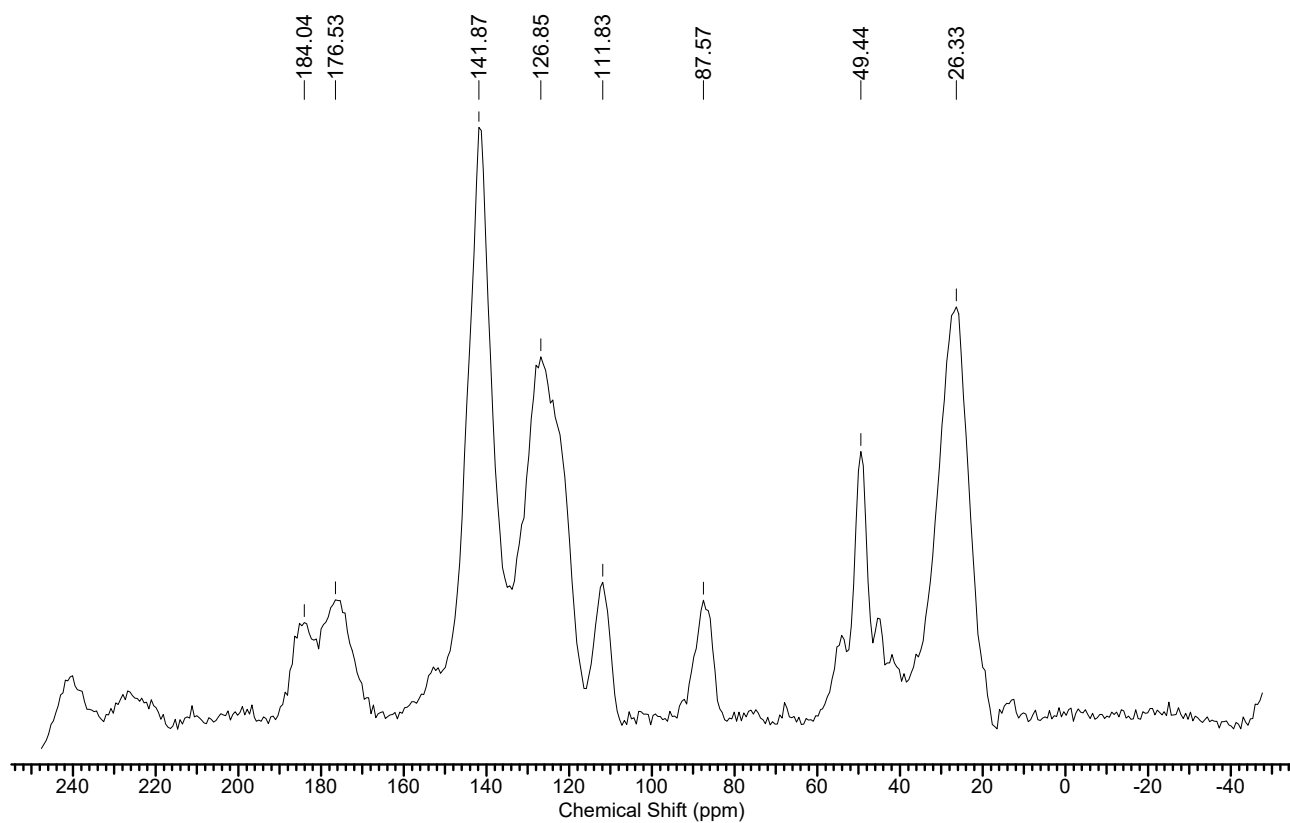

**Fig. S4** Solid state  $^{13}\text{C}$  NMR analysis of **PSQ**.

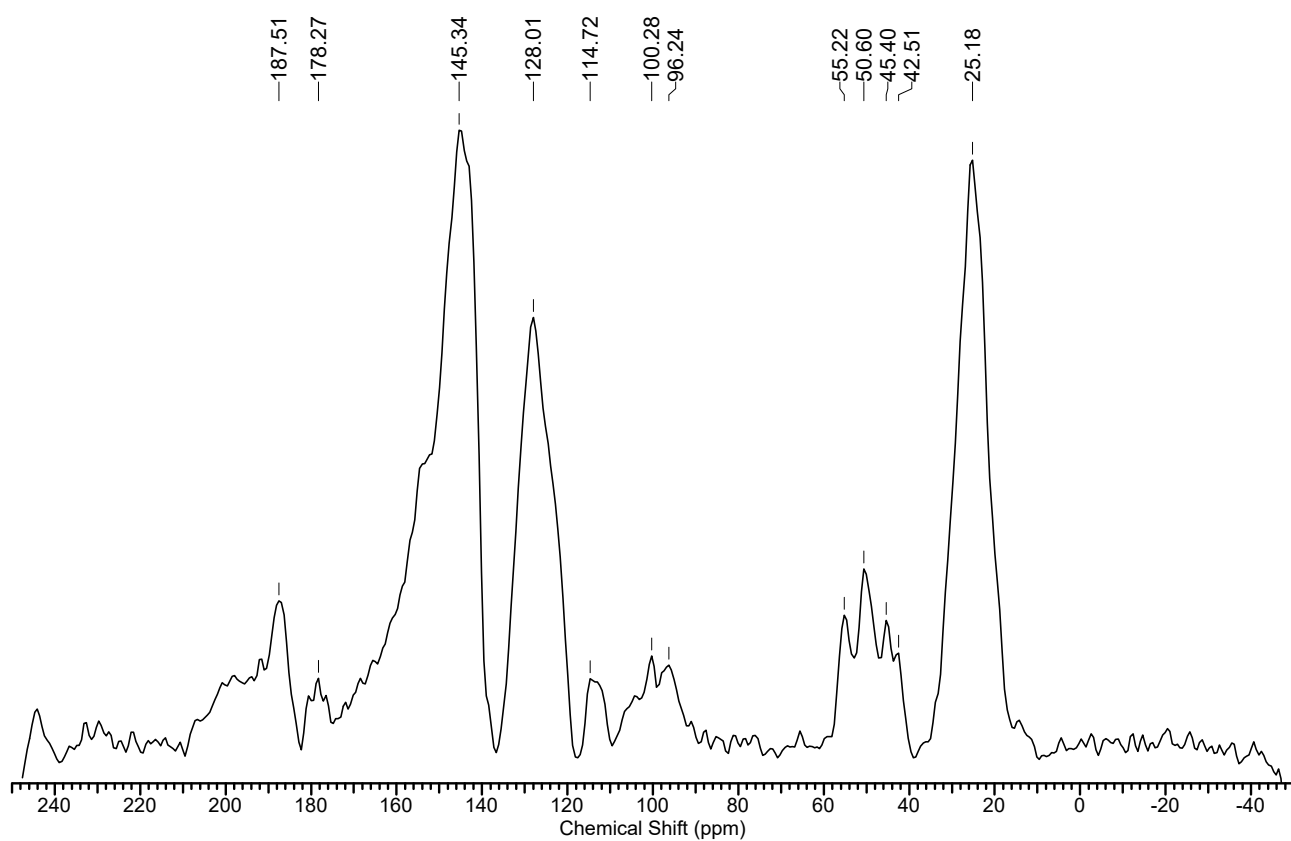

**Fig. S5** Solid state  $^{13}\text{C}$  NMR analysis of **PCR**.



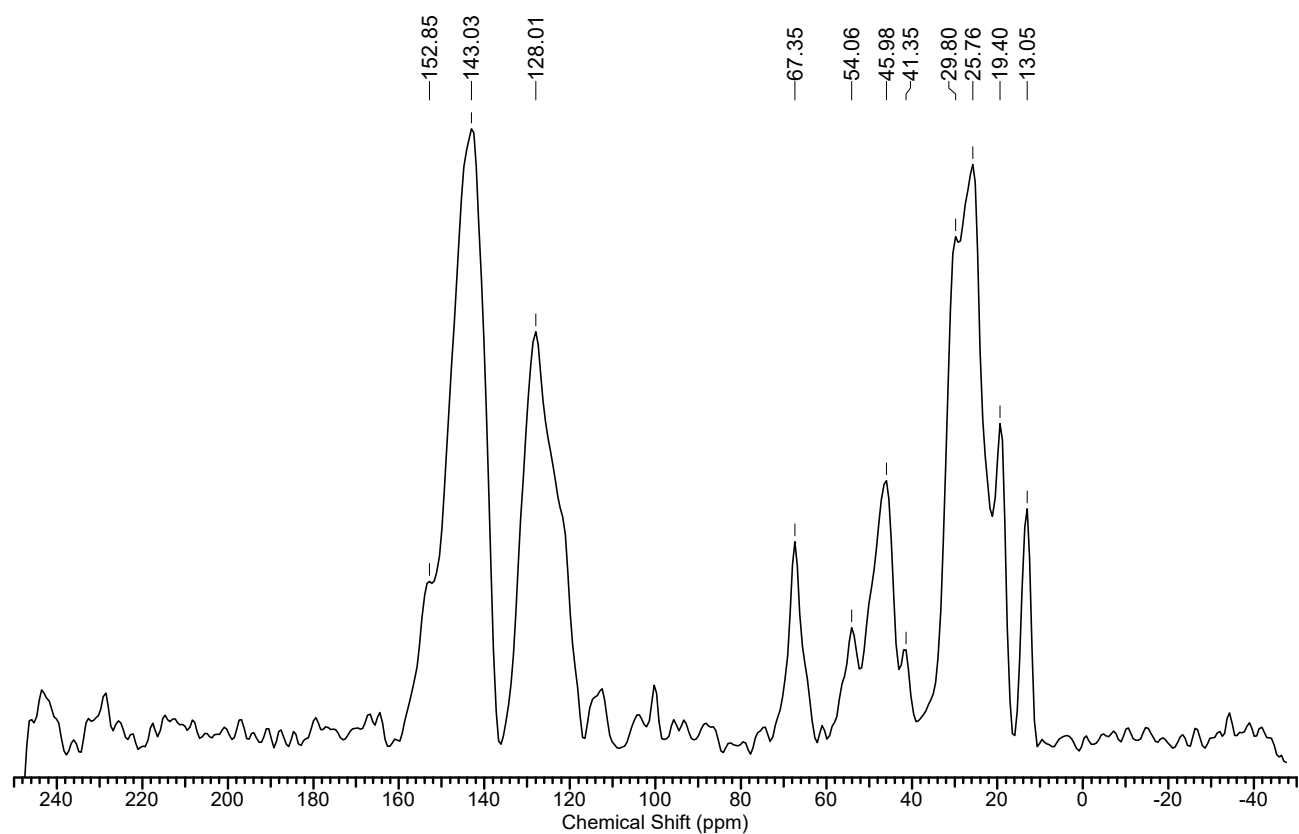

**Fig. S6** Solid state  $^{13}\text{C}$  NMR analysis of **PRH**.

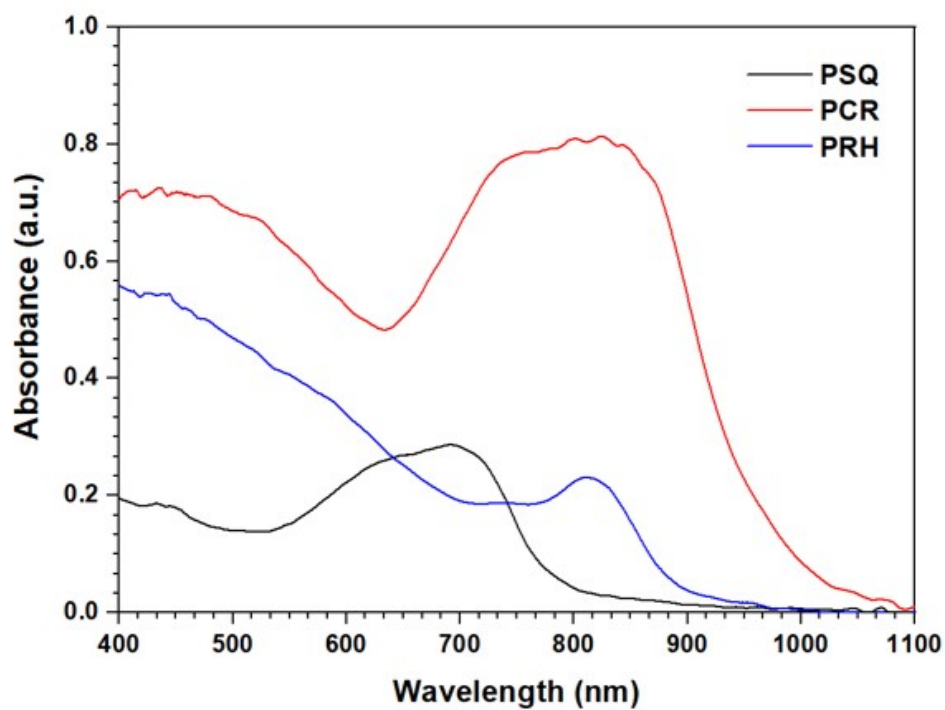

**Fig. S7** UV-Vis spectra of **PSQ**, **PCR** and **PRH** with local  $\lambda_{\text{max}}$  ranging from 700-850 nm.

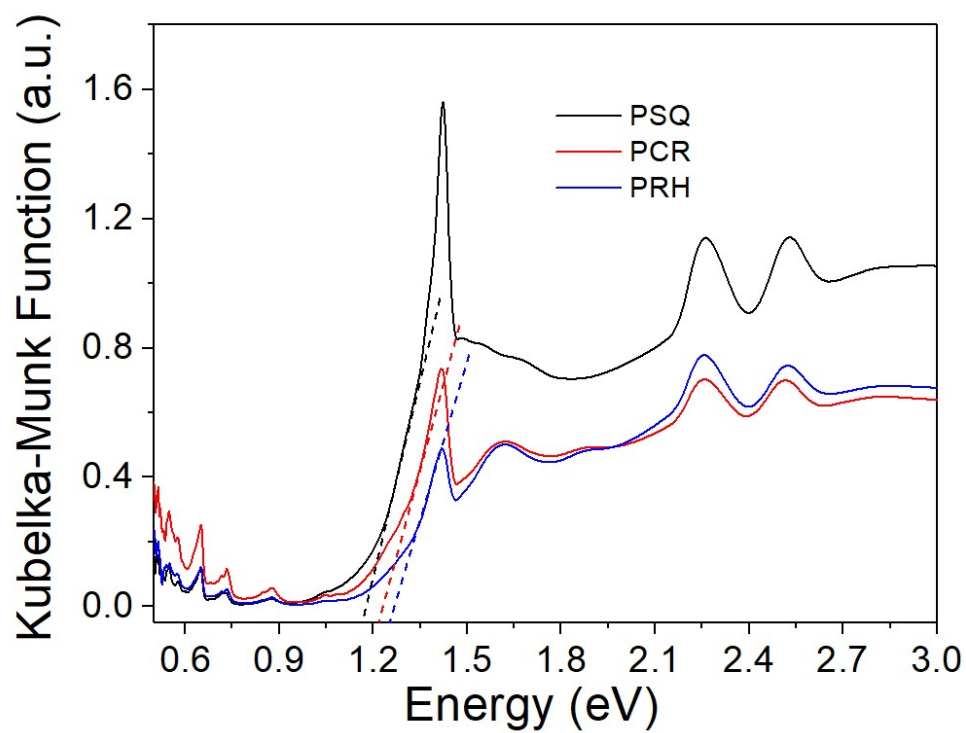

**Fig. S8** Diffuse reflectance spectra for **PSQ**, **PCR** and **PRH**.

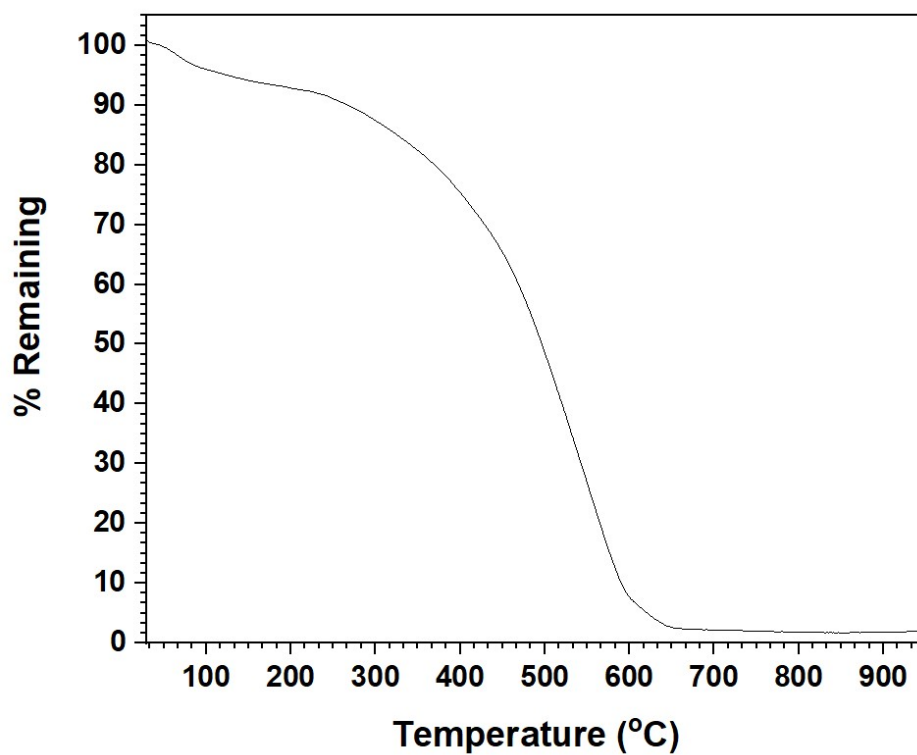

**Fig. S9** TGA trace for **PSQ**.

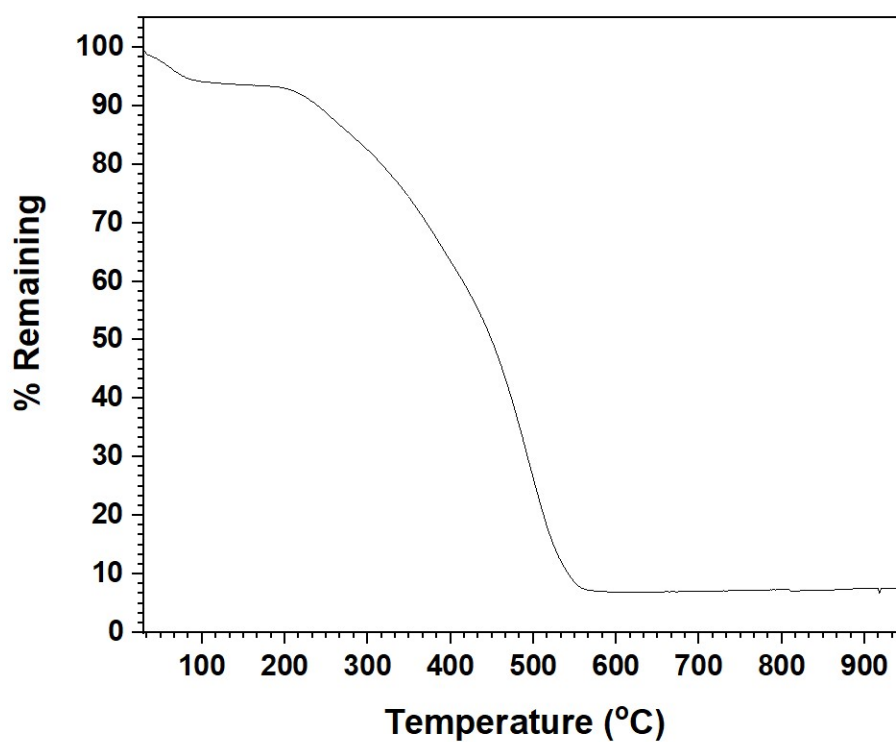

**Fig. S10** TGA trace for **PCR**.

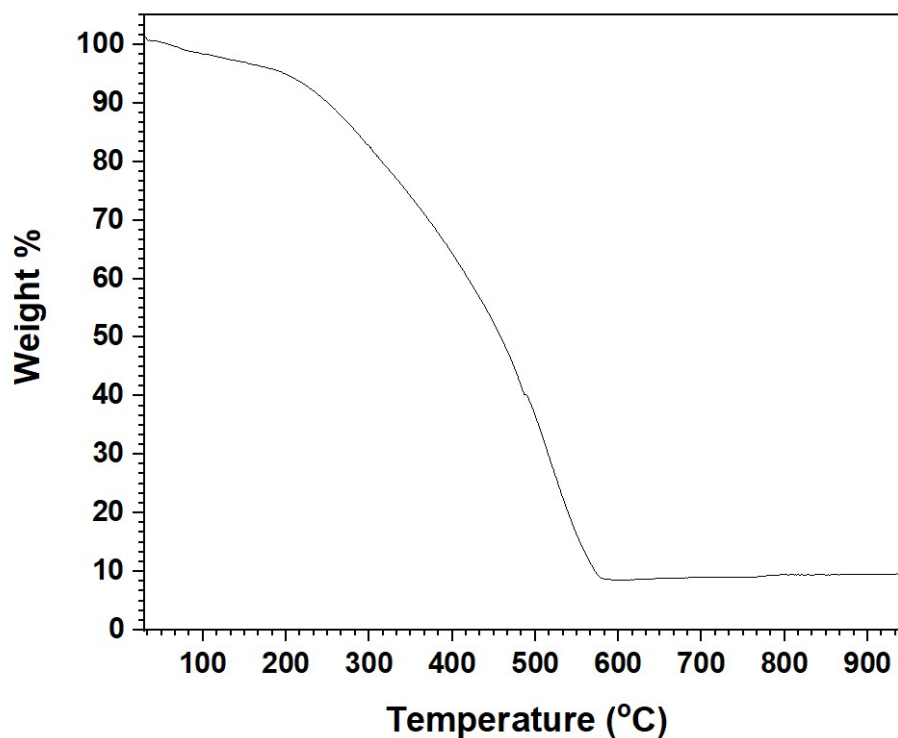

**Fig. S11** TGA trace for **PRH**.

**Procedures for the surface area analyses for PSQ, PCR and PRH.** The porosity analyses were performed using a Quantachrome Autosorb iQ gas sorption analyzer. Each polymeric samples was outgassed at 0.03 torr with a 2 °C/min ramp to 100 °C and held at 100 °C for 12 hours. Pore analysis was first performed using CO<sub>2</sub> at 273.15 K. Afterwards, each sample was reactivated at 0.03 torr with a 2 °C/min ramp to 100 °C and held at 100 °C for 12 hours. Pore analysis was then performed using N<sub>2</sub> at 77.35 K ( $P/P_0$  range of  $1 \times 10^{-5}$  to 0.995).

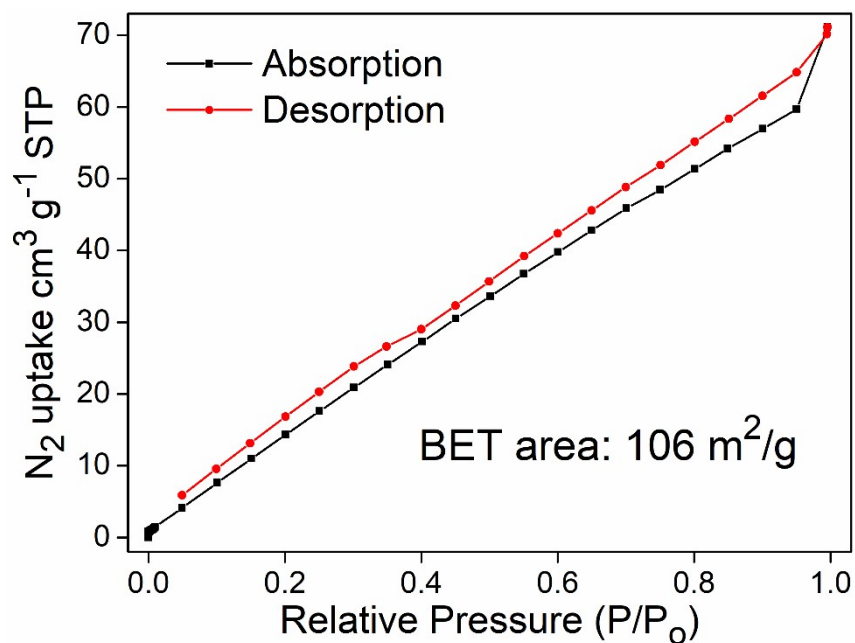

**Fig. S12**  $N_2$  sorption isotherms at 77 K for a sample of **PSQ** (80.2 mg). Inset: the corresponding Brunauer–Emmett–Teller (BET) surface area of 106  $\text{m}^2/\text{g}$ .

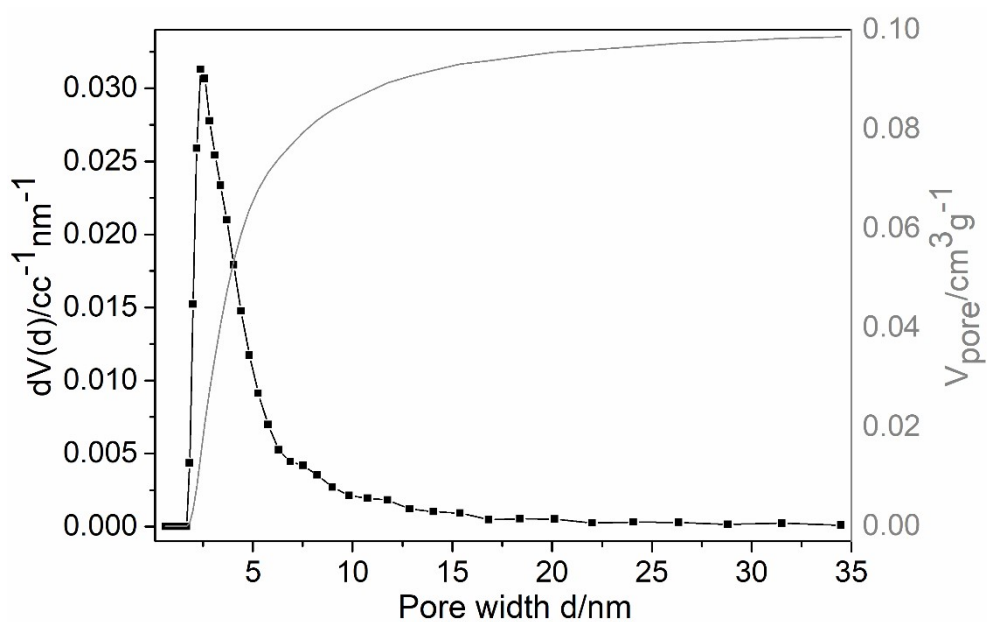

**Fig. S13** Pore size distribution and pore volume of a sample of **PSQ** ( $N_2$  gas at 77 K; QSDFT model). The average pore width 2.382 nm, the pore volume 0.099  $\text{cm}^3/\text{g}$ .

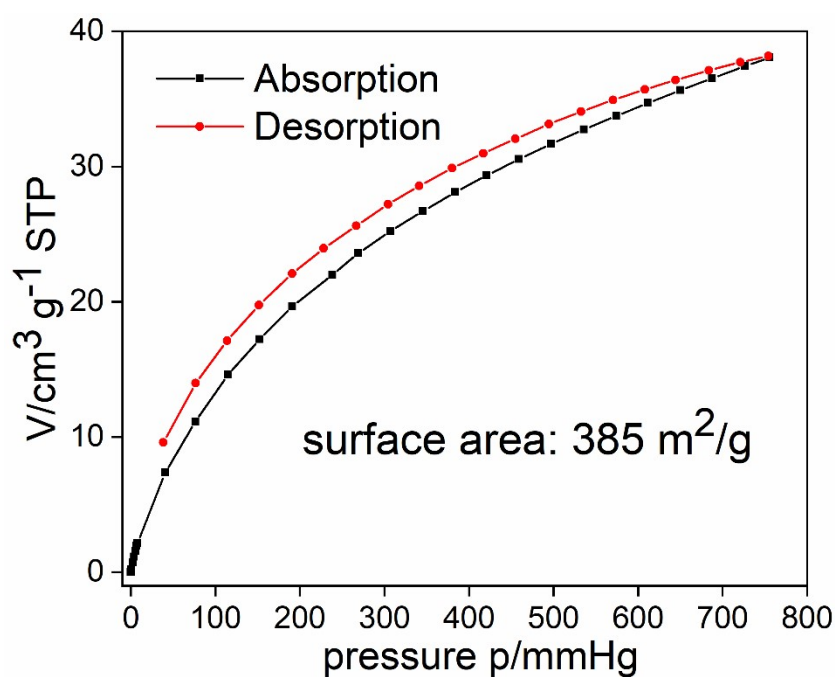

**Fig. S14** CO<sub>2</sub> sorption isotherms at 273 K for a sample of **PSQ** (80.2 mg). Inset: the corresponding surface area of  $385 \text{ m}^2/\text{g}$  (calculated using Monte-Carlo method).

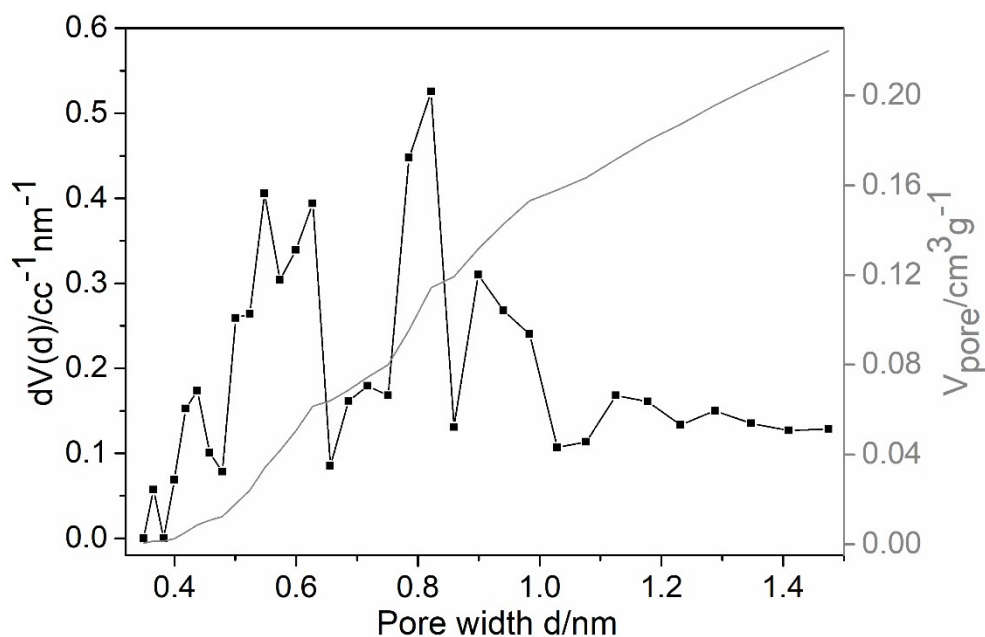

**Fig. S15** Pore size distribution and pore volume of a sample of **PSQ** (CO<sub>2</sub> gas at 273 K; Monte-Carlo model). The average pore width 0.822 nm, the pore volume  $0.220 \text{ cm}^3/\text{g}$ .

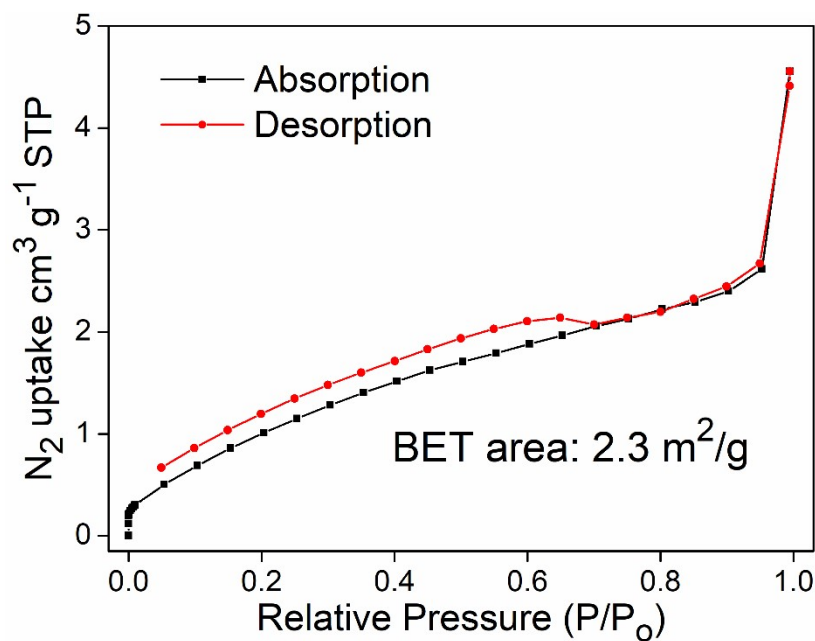

**Fig. S16** N<sub>2</sub> sorption isotherms at 77 K for a sample of **PCR** (110.2 mg). Inset: the corresponding Brunauer–Emmett–Teller (BET) surface area of  $2.3 \text{ m}^2/\text{g}$ .

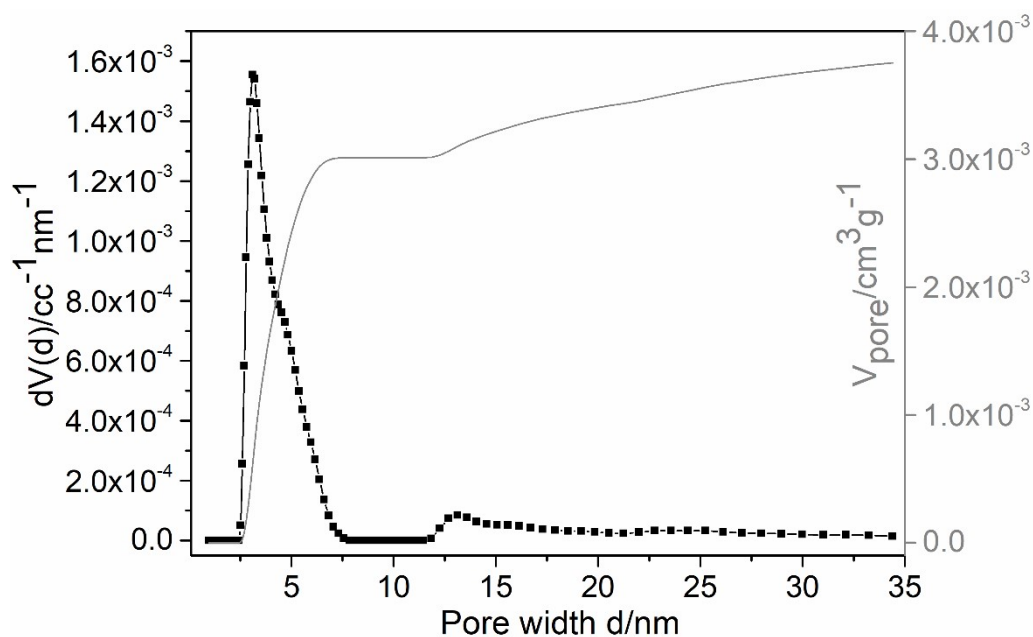

**Fig. S17** Pore size distribution and pore volume of a sample of **PCR** (N<sub>2</sub> gas at 77 K; QSDFT model). The average pore width 3.096 nm, the pore volume  $0.005 \text{ cm}^3/\text{g}$ .

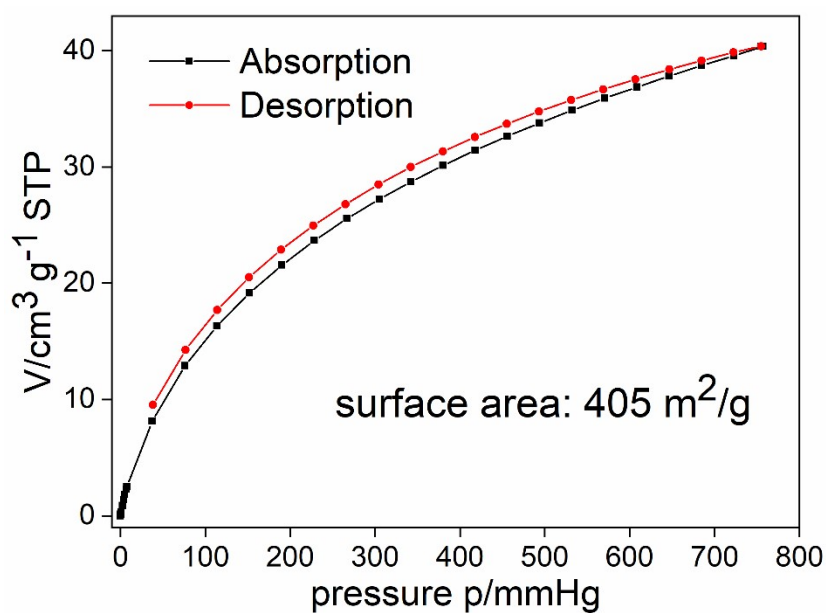

**Fig. S18** CO<sub>2</sub> sorption isotherms at 273 K for a sample of **PCR** (110.2 mg). Inset: the corresponding surface area of  $405 \text{ m}^2/\text{g}$  (calculated using Monte-Carlo method).

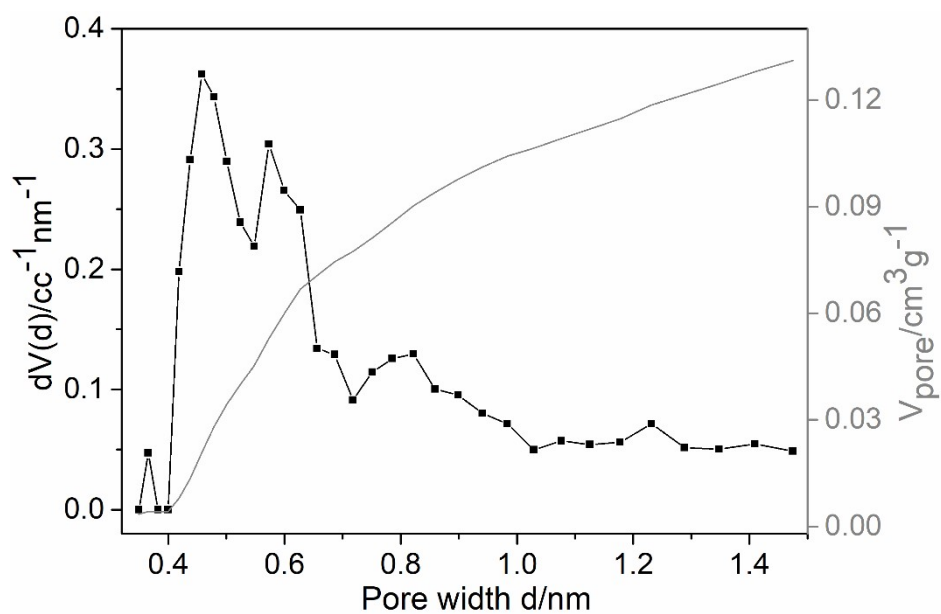

**Fig. S19** Pore size distribution and pore volume of a sample of **PCR** (CO<sub>2</sub> gas at 273 K; Monte-Carlo model). The average pore width  $0.458 \text{ nm}$ , the pore volume  $0.131 \text{ cm}^3/\text{g}$ .



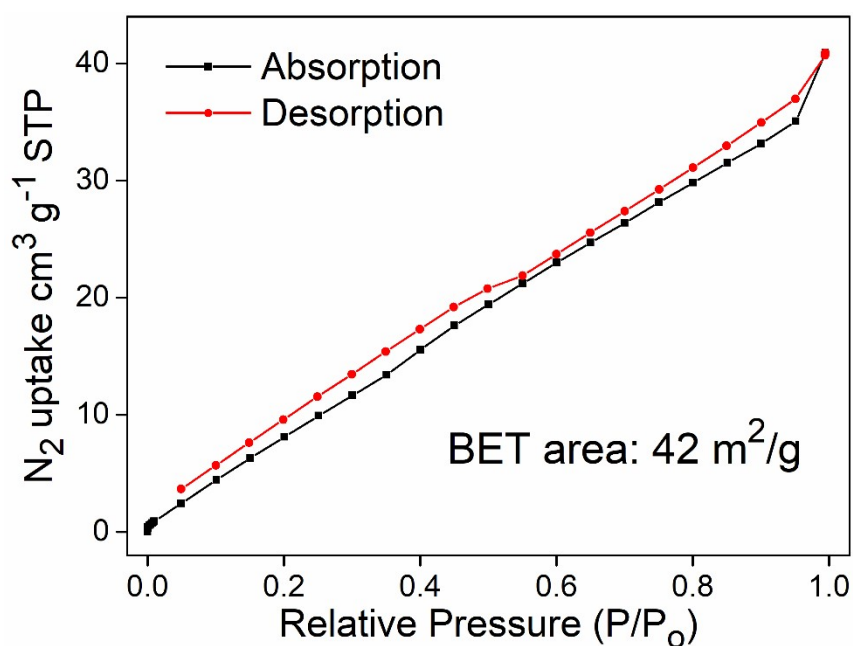

**Fig. S20**  $N_2$  sorption isotherms at 77 K for a sample of **PRH** (64.9 mg). Inset: the corresponding Brunauer–Emmett–Teller (BET) surface area of 42  $\text{m}^2/\text{g}$ .

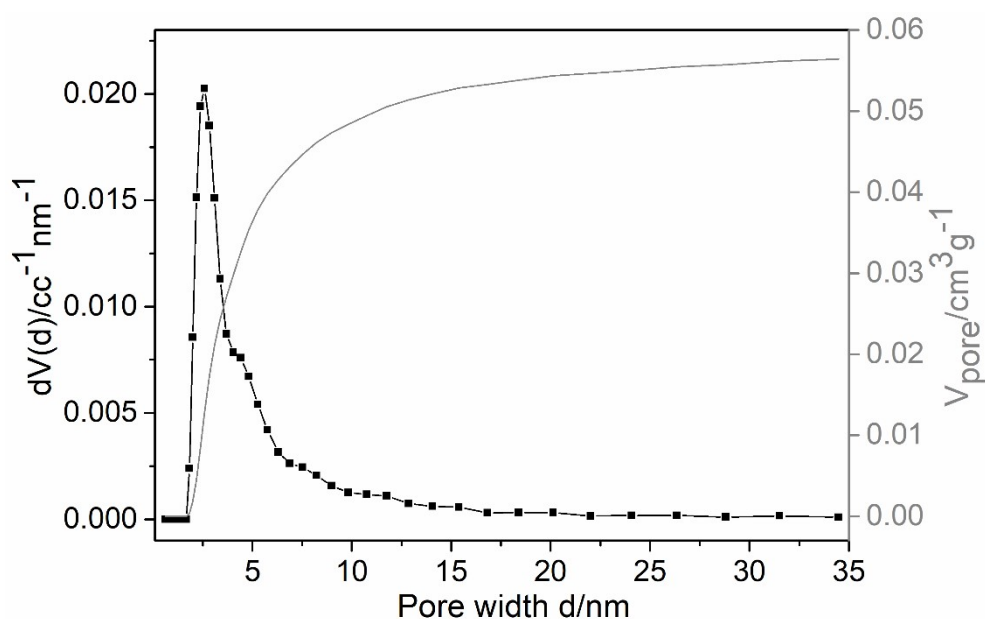

**Fig. S21** Pore size distribution and pore volume of a sample of **PRH** ( $N_2$  gas at 77 K; QSDFT model). The average pore width 2.6 nm, the pore volume 0.056  $\text{cm}^3/\text{g}$ .

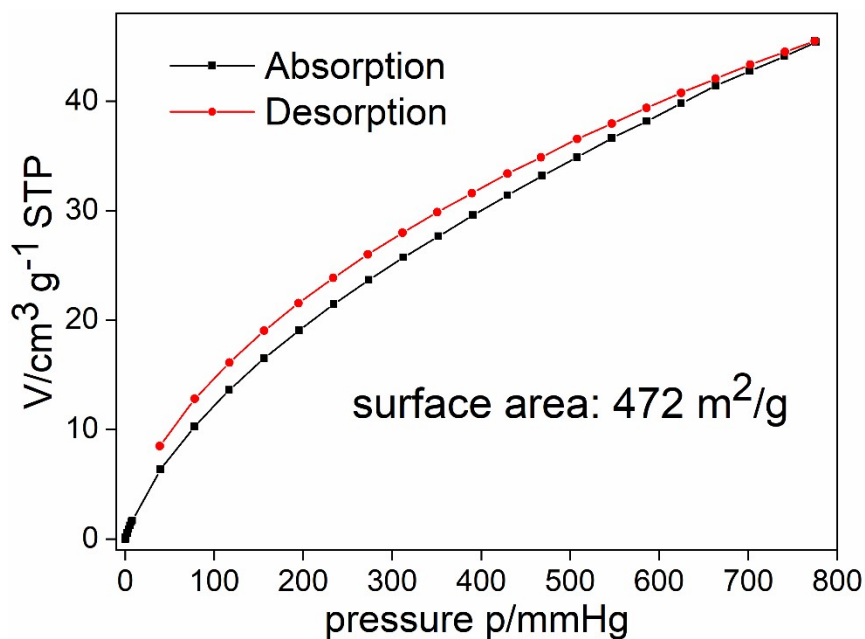

**Fig. S22** CO<sub>2</sub> sorption isotherms at 273 K for a sample of **PRH** (58.9 mg). Inset: the corresponding surface area of  $472 \text{ m}^2/\text{g}$  (calculated using Monte-Carlo method).

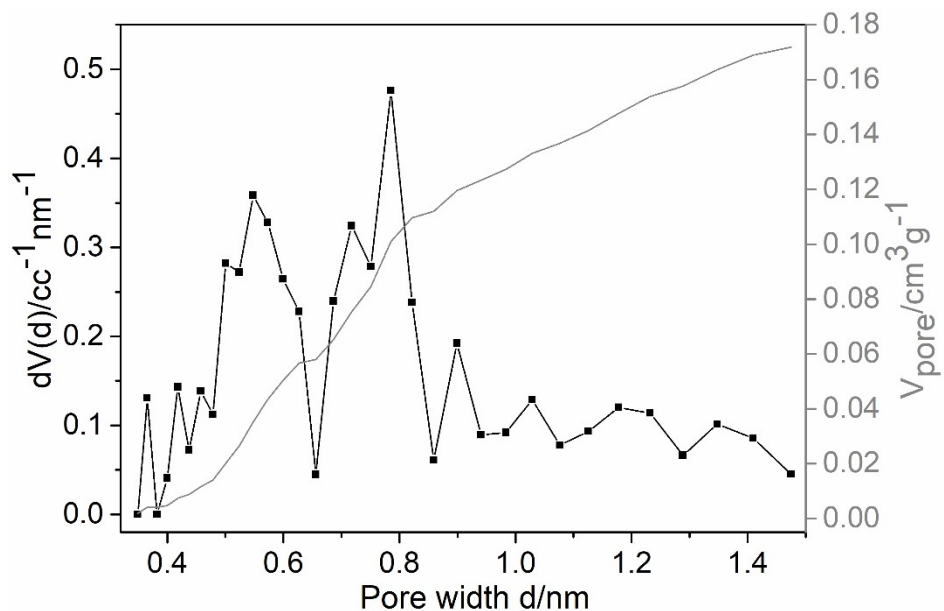

**Fig. S23** Pore size distribution and pore volume of a sample of **PRH** (CO<sub>2</sub> gas at 273 K; Monte-Carlo model). The average pore width  $0.785 \text{ nm}$ , the pore volume  $0.172 \text{ cm}^3/\text{g}$ .

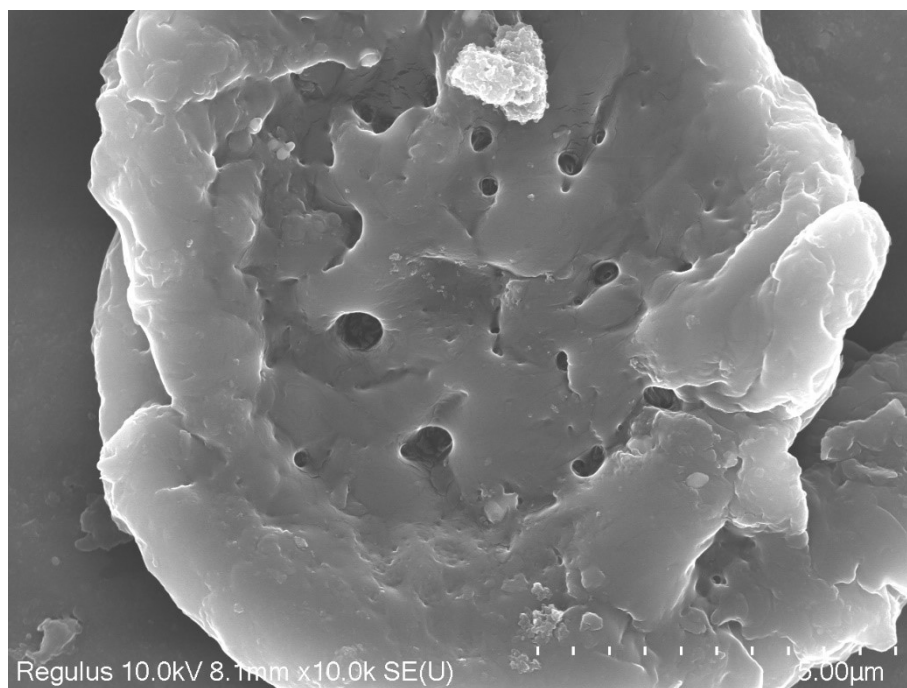

**Fig. S24** SEM image of **PSQ**.

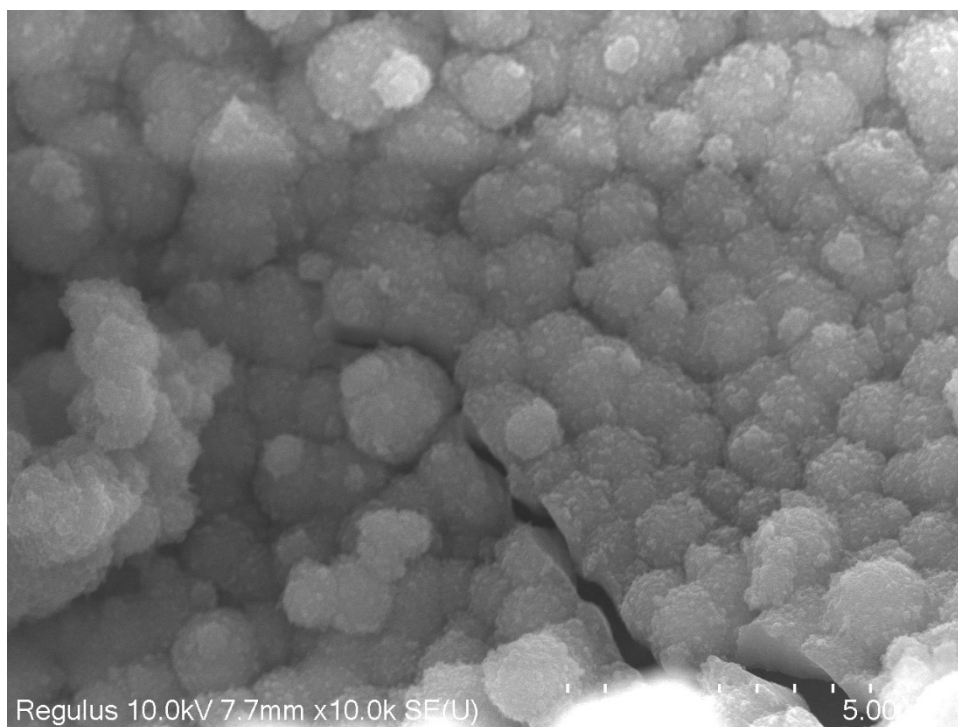

**Fig. S25** SEM image of **PCR**.

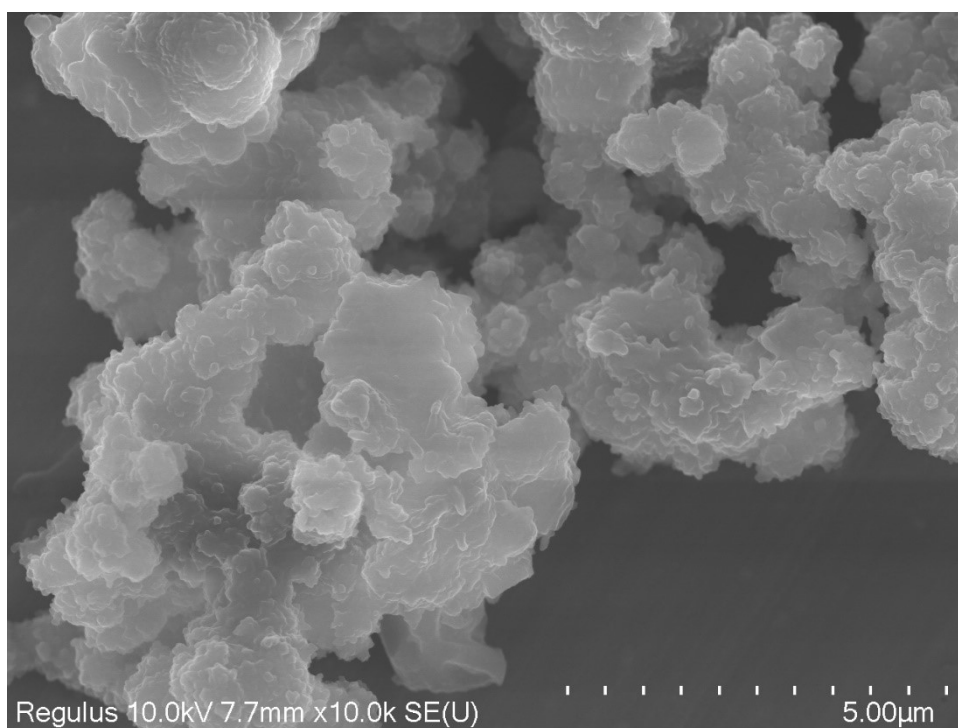

**Fig. S26** SEM image of **PRH**.

### 3. Impedance Analysis

AC impedance data were obtained using a pellet (3 mm in diameter) pressed at 5,000 kg for a couple of minutes. The thickness of the pellet was ranging from 0.5 to 1.0 mm. The pellet was placed in a sample holder composed of electrode and the sample holder was put in a chamber controlling temperature and humidity. Data points were obtained after the condition to be stable over 30 min. Measurements were carried out using a Solartron SI 1260 Impedance/Gain-Phase Analyzer and 1296 Dielectric Interface and applied AC voltage amplitude of 100 mV and frequency range of 10 MHz - 1 Hz.

#### *Synthesis of LiCl@PSQ*

PSQ (15 mg) was ground for 30 min and then washed with deionised water (5 mL × 3) and acetone (5 mL × 3). After being dried in air, **PSQ** was immersed into saturated lithium chloride in THF (2 mL) for 2 days at room temperature. Then, the sample was filtered, washed with THF (5 mL × 3) and acetone (5 mL × 3), dried in air to afford the **LiCl@PSQ** sample.

#### *Synthesis of LiCl@PCR*

**PCR** (15 mg) was immersed into saturated lithium chloride in THF (2 mL) for 2 days at room temperature. Then, the sample was filtered, washed with THF (5 mL × 3) and acetone (5 mL × 3), dried in air to afford the **LiCl@PCR** sample.

#### *Synthesis of LiCl@PRH*

**PRH** (15 mg) was ground for 30 min and then washed with deionised water (5 mL × 3) and acetone (5 mL × 3). After being dried in air, **PRH** was immersed into saturated lithium chloride in THF (2 mL) for 2 days at room temperature. Then, the sample was filtered,

washed with THF (5 mL × 3) and acetone (5 mL × 3), dried in air to afford the **LiCl@PRH** sample.

### Calculation for proton conductivity and activation energy.

The Nyquist plots ( $Z''$  vs.  $Z'$ ) of proton-conducting MOF often show a single semicircle at high frequency, representing proton resistivity contributions of bulk sample. The proton conductivity was deduced from the semicircle by fitting an equivalent circuit which consists of  $R_s$ ,  $R_1$  and  $W_1$  in the frequency range from 10 MHz to 1 Hz.  $R_s$  corresponds to wire and electrode resistance,  $R_1$  is proton resistance and  $W_1$  attributes to the resistivity of grain boundary. Sometimes  $W_1$  is not necessary, because the impedance plot of the capacitive tail may not appear in the measured range due to the high magnitude of the resistivity.

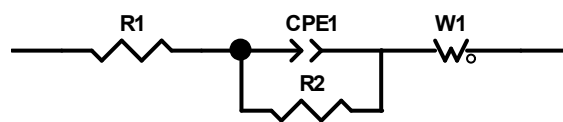

The water-assisted conductivities of synthesized materials were measured under different relative humidity and temperature conditions and were further fitted with different fitting circuits using the ZView software. Proton conductivity ( $\sigma$ , S cm<sup>-1</sup>) was calculated from the impedance spectra with the equation of  $\sigma = l/RS$ , where  $l$  is the thickness (mm) and  $S$  is the cross-sectional area (mm<sup>2</sup>) of the pellet, while  $R$  ( $\Omega$ ) can be calculated from the impedance plots. The activation energy values were calculated using the Arrhenius equation  $\sigma T = \sigma_0 \exp(-E_a/kT)$  by the slope of the plots of  $\ln(\sigma T)$  versus  $1000/T$ .

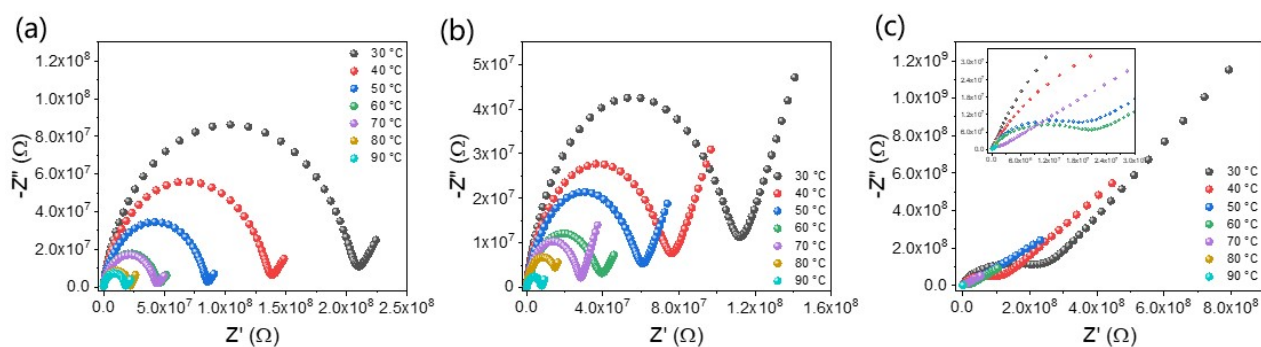

**Fig. S27** Nyquist plots of (a) **PSQ**, (b) **PCR** and (c) **PRH** at different temperatures (from 30 °C to 90 °C) and 90% relative humidity.

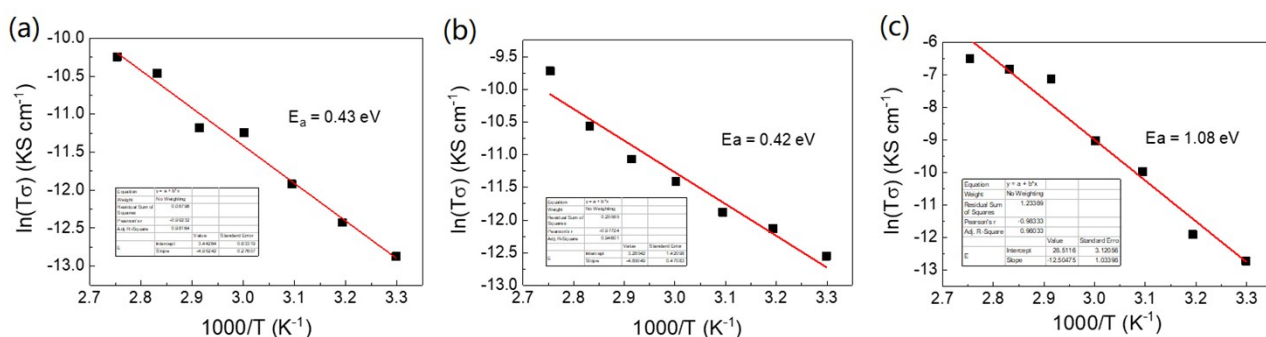

**Fig. S28** Arrhenius plot of conductivities for bulk contribution to resistivity of (a) **PSQ**, (b) **PCR** and (c) **PRH** at 90% relative humidity.

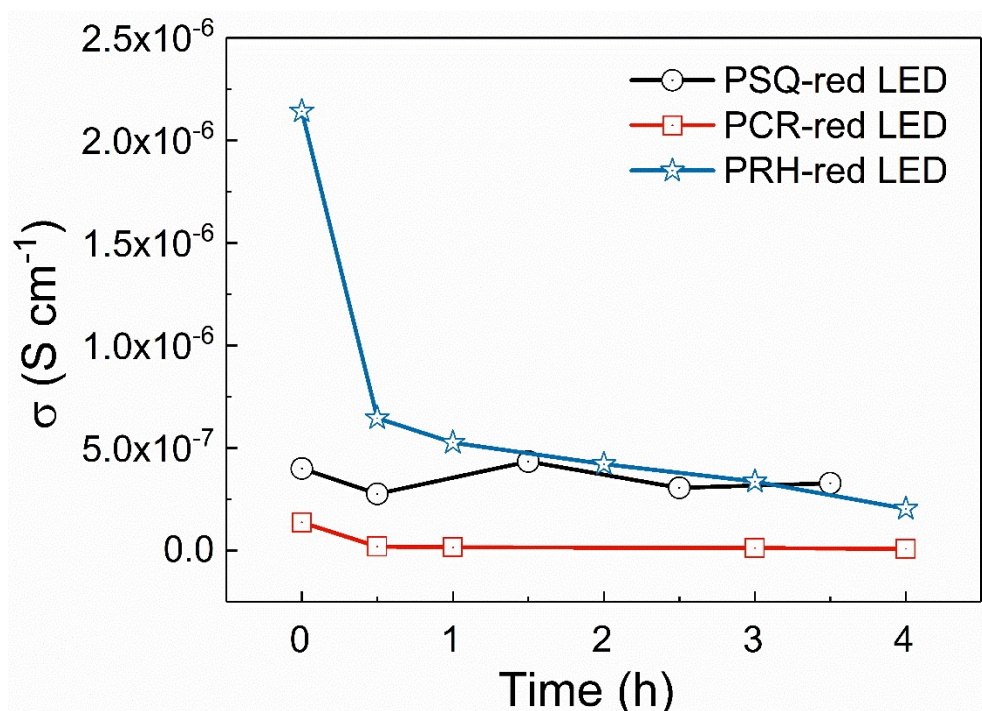

**Fig. S29** Proton conductivity of **PSQ**, **PCR**, **PRH** after being illuminated by the red LED light for different time at 90 °C and 90% relative humidity.

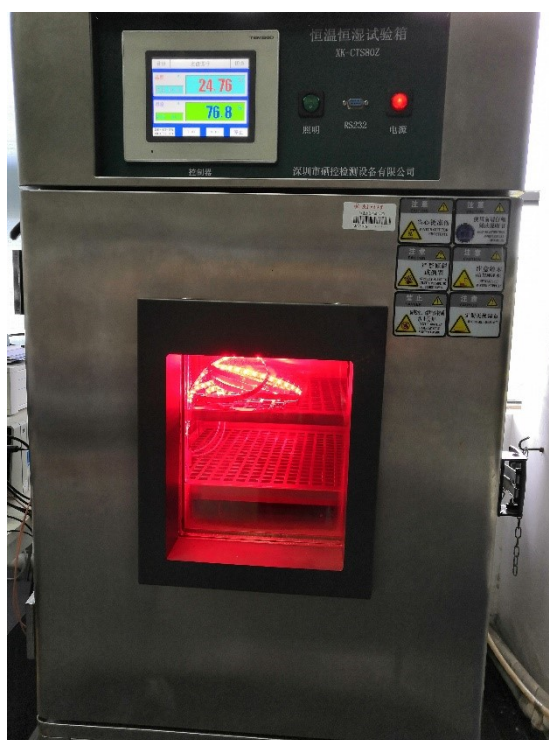

**Fig. S30** A photograph of the device to measure impedance of sample after being illuminated by a red LED module.



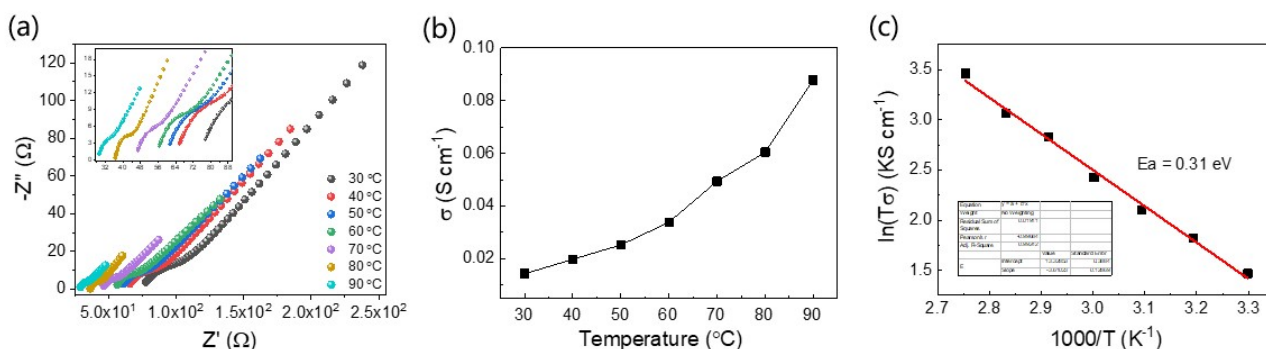

**Fig. S31** (a) Nyquist plots and (b) proton conductivity of **LiCl@PSQ** at different temperatures (from 30°C to 90°C) and 90% relative humidity. (c) Arrhenius plot of conductivities for bulk contribution to resistivity of **LiCl@PSQ** at 90% relative humidity.

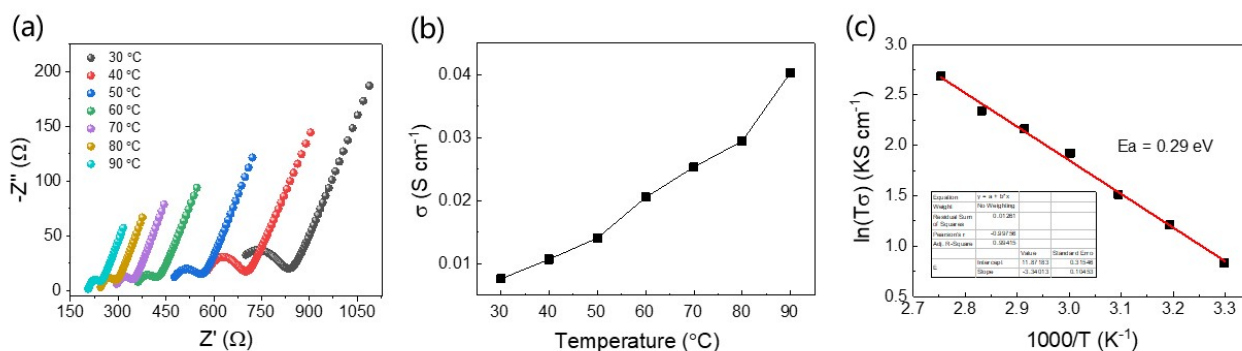

**Fig. S32** (a) Nyquist plots and (b) proton conductivity of **LiCl@PSQ** at different temperatures (from 30°C to 90°C) and 40% relative humidity. (c) Arrhenius plot of conductivities for bulk contribution to resistivity of **LiCl@PSQ** at 40% relative humidity.

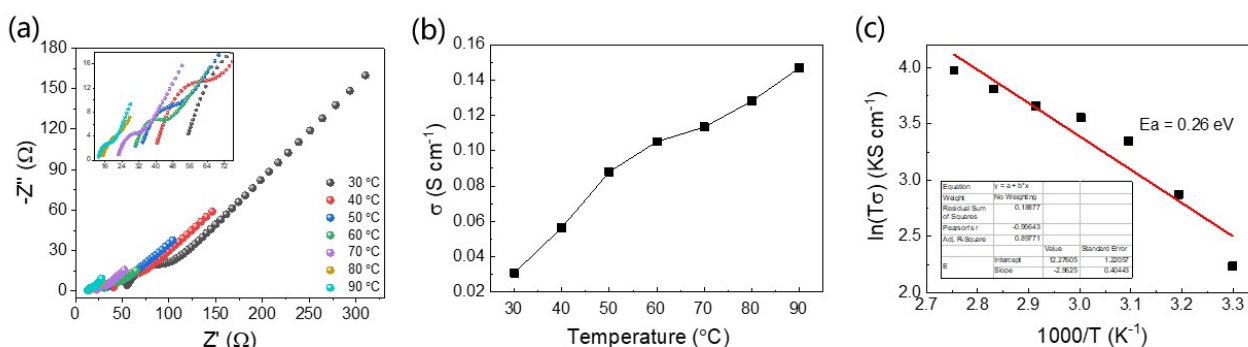

**Fig. S33** (a) Nyquist plots and (b) proton conductivity of **LiCl@PCR** at different temperatures (from 30°C to 90°C) and 90% relative humidity. (c) Arrhenius plot of conductivities for bulk contribution to resistivity of **LiCl@PCR** at 90% relative humidity.

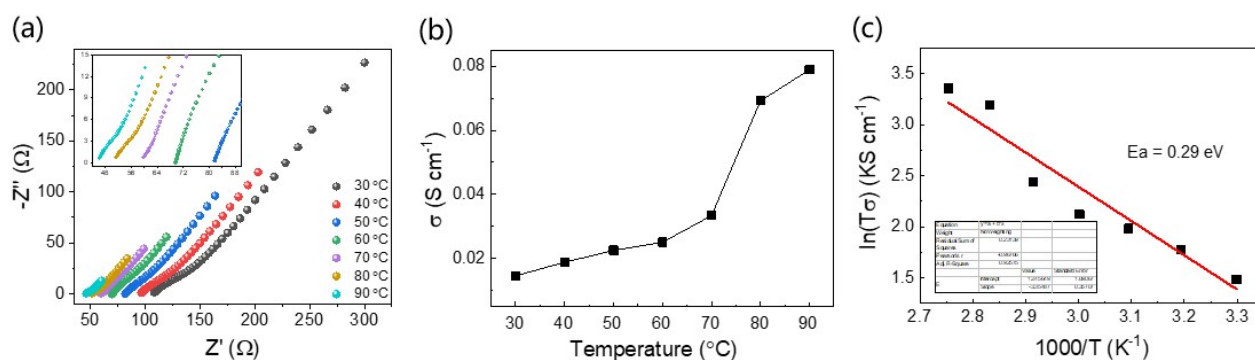

**Fig. S34** (a) Nyquist plots and (b) proton conductivity of **LiCl@PCR** at different temperatures (from 30 °C to 90 °C) and 40% relative humidity. (c) Arrhenius plot of conductivities for bulk contribution to resistivity of **LiCl@PCR** at 40% relative humidity.

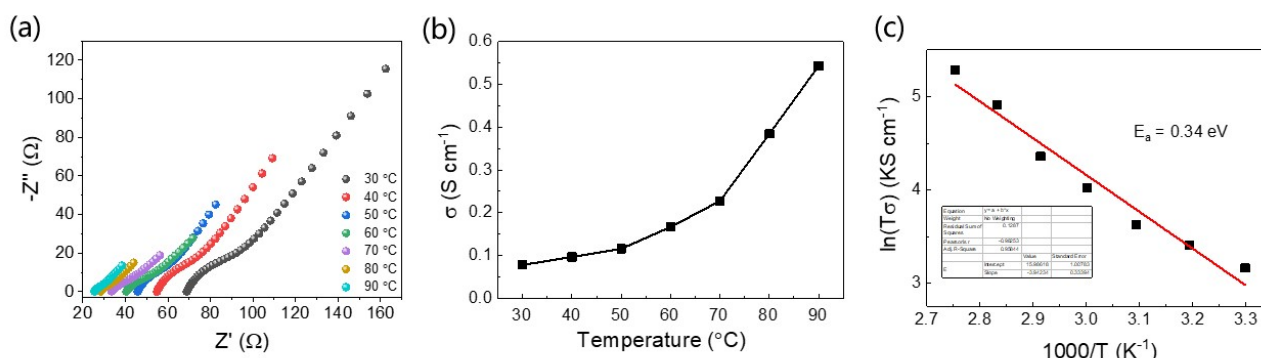

**Fig. S35** (a) Nyquist plots and (b) proton conductivity of **LiCl@PRH** at different temperatures (from 30 °C to 90 °C) and 90% relative humidity. (c) Arrhenius plot of conductivities for bulk contribution to resistivity of **LiCl@PRH** at 90% relative humidity.

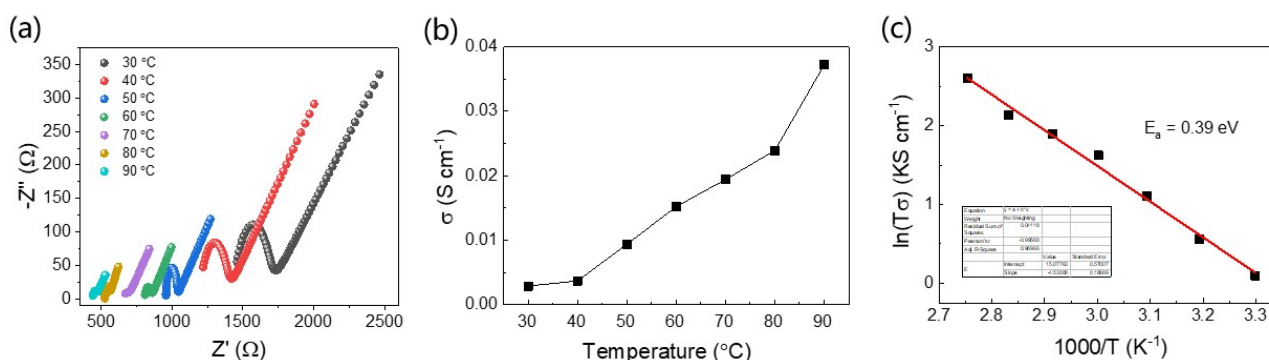

**Fig. S36** (a) Nyquist plots and (b) proton conductivity of **LiCl@PRH** at different temperatures (from 30 °C to 90 °C) and 40% relative humidity. (c) Arrhenius plot of conductivities for bulk contribution to resistivity of **LiCl@PRH** at 40% relative humidity.

**Table S1** Proton conduction results of **PSQ**, **PCR**, **PRH** and their corresponding samples after soaking in saturated LiCl in THF.

| Sample          | Soaking Medium | Soaking Temperature/<br>°C | Soaking Time | $\sigma$ / S cm <sup>-1</sup> | Relative humidity/% | T/°C | E <sub>a</sub> /eV |
|-----------------|----------------|----------------------------|--------------|-------------------------------|---------------------|------|--------------------|
| <b>PSQ</b>      | -              | -                          | -            | 9.8 x 10 <sup>-8</sup>        | 90                  | 90   | 0.43               |
| <b>LiCl@PSQ</b> | LiCl/THF       | RT                         | 2 days       | 0.088                         | 90                  | 90   | 0.31               |
| <b>LiCl@PSQ</b> | LiCl/THF       | RT                         | 2 days       | 4.0 x 10 <sup>-2</sup>        | 40                  | 90   | 0.29               |
| <b>PCR</b>      | -              | -                          | -            | 1.9 x 10 <sup>-7</sup>        | 90                  | 90   | 0.42               |
| <b>LiCl@PCR</b> | LiCl/THF       | RT                         | 2 days       | 0.15                          | 90                  | 90   | 0.26               |
| <b>LiCl@PCR</b> | LiCl/THF       | RT                         | 2 days       | 7.9 x 10 <sup>-2</sup>        | 40                  | 90   | 0.29               |
| <b>PRH</b>      | -              | -                          | -            | 4.1 x 10 <sup>-6</sup>        | 90                  | 90   | 1.08               |
| <b>LiCl@PRH</b> | LiCl/THF       | RT                         | 2 days       | 0.54                          | 90                  | 90   | 0.34               |
| <b>LiCl@PRH</b> | LiCl/THF       | RT                         | 2 days       | 3.7 x 10 <sup>-2</sup>        | 40                  | 90   | 0.39               |

Theoretically, the proton conductivity has a good correlation with the activation energy, i.e., the proton conductivities follow the order **PSQ** < **PCR** < **PRH**, the activation energy follow the order **PSQ** > **PCR** > **PRH** (*J. Am. Chem. Soc.* 2011, 133, 2034–2036). However, the measured activation energies of **PSQ**, **PCR** and **PRH** at 90 °C were 0.43, 0.42 and 1.08 eV, respectively. As for the higher activation energy of **PRH**, one possibility is onset of a glass or phase transition that causes the sites preferred by protons in the polymer to become disordered. (*J. Am. Ceram. Soc.* 2002, 85, 2637)

### ***pH-Measurement of PSQ, PCR and PRH***

10 mg of sample polymer was immersed into deionized water (0.2 mL). After sonication, the pH was measured using universal indicator paper (see Figure S37). Two key observations were drawn from this experiment: 1) The pH values all point to weak acidity (no lower than 4), indicating low concentrations of protons, and consistent with the low proton conductivities of all three as-made samples at room temperature. 2) The pH values of the **PRH** and **PCR** are slightly lower than that of **PSQ**, which could be caused by the greater number of electron-withdrawing C=O groups in the croconic (3 C=O groups) and rhodizonic (4 C=O groups) units, relative to the squaric (2 C=O groups) unit.

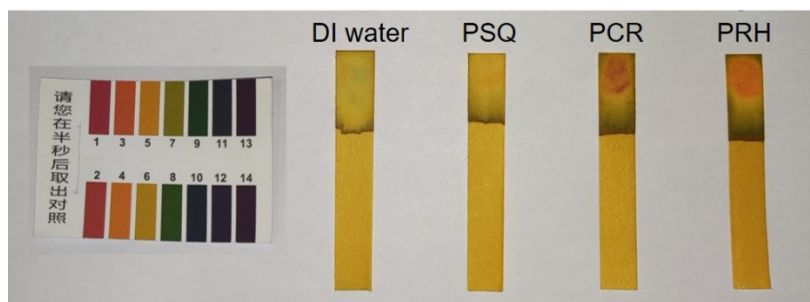

**Fig. S37** pH Measurements of **PSQ**, **PCR** and **PRH**.
